# Supplementary material
Source: MDPI journal article supplement (https://www.mdpi.com/search?q=ijms-21-06959)
Supplement: s001 [file ijms-21-06959-s001.pdf]

## Supplementary Materials

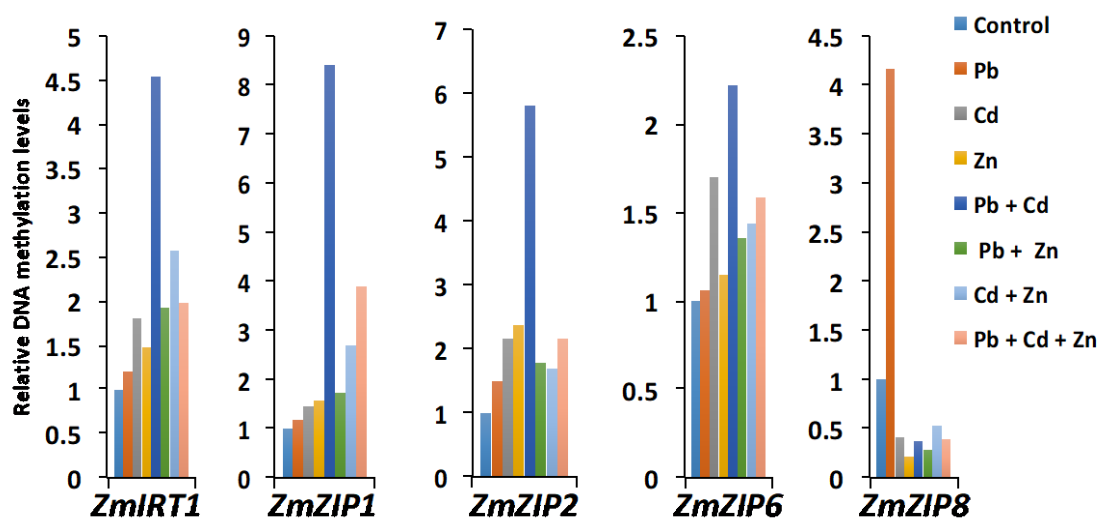

**Figure 1.** Quantification of DNA methylation levels at the promoter of selected ZIP transporters in response to Pb/Cd/Zn applied alone and in combinations from Figure 6. DNA was digested with McrBc and equal amounts of digested or undigested DNA were used as template for PCR. McrBC digests the methylated DNA; therefore, lighter band intensity reflects the more DNA methylation levels. Band intensity of digested and non-digested was calculated with Image J. To calculate the relative DNA methylation levels from the image, band intensity of non-digested was divided with McrBC digested band intensity and presented in the graph.

**Table S1.** Monovalent Potassium (K) in the roots, shoots and leaves in response to Pb/Cd/Zn applied alone and in combinations.

| Treatment   | K (mg/g) |       |      |       |
|-------------|----------|-------|------|-------|
|             | Leaf     | Shoot | Root | Total |
| Control     | 5.12     | 5.09  | 5.06 | 15.27 |
| Pb          | 5.03     | 5.15  | 5.05 | 15.23 |
| Cd          | 5.03     | 5.11  | 5.02 | 15.16 |
| Zn          | 5.13     | 5.10  | 5.09 | 15.32 |
| Pb + Cd     | 5.10     | 5.11  | 5.09 | 15.30 |
| Pb + Zn     | 5.14     | 5.10  | 5.10 | 15.34 |
| Cd + Zn     | 5.14     | 5.15  | 4.71 | 15.00 |
| Pb + Cd+ Zn | 5.11     | 5.13  | 5.09 | 15.34 |

The plants were grown in Hydroponic culture and metal accumulation was investigated after two weeks of treatment. The results shown are the averages of three biological replicates. Small letters represent the statistical difference ( $P < 0.05$ ).

**Table S2.** Primers used in this study.

| <b>Gene</b>     |   | <b>Sequence 5'-3'</b>      |
|-----------------|---|----------------------------|
| qRT-PCR         |   |                            |
| <i>ZMZIP1</i>   | F | CCTCTCTGCGTTGGTTGCTCT      |
|                 | R | TTGATGGTTGTTTTCTGGTCGT     |
| <i>ZMZIP2</i>   | F | CCACAAATGGCACGAGGTCT       |
|                 | R | CGAAGACGGAGTGGAAGCAAA      |
| <i>ZMZIP3</i>   | F | GCCTCTTGTTGGTGCCCTTA       |
|                 | R | TCAACAATGAACGCTGTAGTGCT    |
| <i>ZMZIP4</i>   | F | CCTTCTTCTCGCTCACCGCT       |
|                 | R | AGCCTCGGGTTGCTGAAGT        |
| <i>ZMZIP5</i>   | F | GCACATAGGCATAGCCACGC       |
|                 | R | ACGCCCAAAGATAGCCCGAT       |
| <i>ZMZIP7</i>   | F | ACTAGGTGGGTGCATTGCTCAG     |
|                 | R | TGCCAGCAGATACCGAGTCAA      |
| <i>ZMZIP6</i>   | F | GCTACGACGATAGCAATCCAA      |
|                 | R | GGTCGACTAGCGCCATATAGA      |
| <i>ZMZIP8</i>   | F | GTTCAAGCTGCGGTTCGAT        |
|                 | R | TCGTACACCGACGAGATCC        |
| <i>ZMIRT1</i>   | F | CATCGTGGTGGCTGACAA         |
|                 | R | GACGATGCCCATCTCCAG         |
| <i>ZMET1</i>    | F | TTAAGCTGTCAAATGGGCAGATG    |
|                 | R | CCGTACAGTCCTTCCACTGATT     |
| <i>ZMMET2A</i>  | F | AAGGCTCAGCTGATAGAGAGTTG    |
|                 | R | AAGAAATACCCGAAGCGGTATCA    |
| <i>ZMMET2B</i>  | F | TGGACAACATTGTCTACTGCCTC    |
|                 | R | ACGGCAAGTAAAATAGTGGCATC    |
| <i>ZMMET3A</i>  | F | ACCATTGGACAAGACCAGTAGAC    |
|                 | R | ACAAACTCCGGCTGAATATCGTA    |
| <i>ZMMET3B</i>  | F | AAGTCCCTGTAACAACCTCACTG    |
|                 | R | ATGATGGAACAATGCAGAATGCTC   |
| <i>ZMMET3C</i>  | F | TCGTCTAGGCATCCCTTTGAAAT    |
|                 | R | G TTCAGTTTTCAACCACCACCTT   |
| <i>ZMMET4</i>   | F | ATAGAGAAGTCCAGTCAGCCCT     |
|                 | R | AAACTGTAGTCCCCAAAACCATAC   |
| <i>ZMHD1B</i>   | F | CGTACAATGTTCCCTATGATGGTTT  |
|                 | R | CAACAGCAACTGCGGTCTC        |
| <i>ZMHDA102</i> | F | CTCCCAAATGAGATTCCAAAA      |
|                 | R | AGGTCTTACTGTTCAAATTGTCCAT  |
| <i>ZMHDA110</i> | F | AGCTGGTTCCTCAAATGGAAGAT    |
|                 | R | GTAGCTGATGAGGATATCGACCG    |
| <i>ZMHD2A</i>   | F | AAATCTGGTGGCTCGGTCC        |
|                 | R | GACTCACTTGCCCCCATCTTC      |
| <i>ZMHD2B</i>   | F | ATGATACCAGTGATGATGACGAGG   |
|                 | R | AAAGAGGCGTTTTCAGAGCATTTT   |
| <i>ZMHD2C</i>   | F | CCTGAAGAAGGCGATGATGATTC    |
|                 | R | GAGTTTTCAGCACGGAAC TTCA    |
| <i>ZMHDA106</i> | F | TGATTCCAGTGATGAATCTGGT     |
|                 | R | TTCTTGCCAACTACTACATCAGTCTT |
| <i>ZMHDA1</i>   | F | CGTTGGAGCAGTTCAATGACTTT    |
|                 | R | ATACACAGTGTTTCCGTCTTTGC    |

|                 |   |                             |
|-----------------|---|-----------------------------|
| <i>ZMRPD3</i>   | F | ACTGGATGATATACGATCTAAACTTTC |
|                 | R | TTCTGTGTCAGGAACTCTCTCTT     |
| <i>ZMUBQ</i>    | F | AACCAGCTGAGGCCCAAGA         |
|                 | R | ACGATTGATTTAACCAGTCCATGA    |
| <b>ChOP-PCR</b> |   |                             |
| <i>ZMZIP1</i>   | F | GCTCTTCTTTGTTCTCGTCGTC      |
|                 | R | GCAGGAGGACTCAAAGTGCCCA      |
| <i>ZMZIP2</i>   | F | TGGTGTTTCGTCGGCACGCT        |
|                 | R | TTGGCGTCGCTGAGGAAGTGC       |
| <i>ZMZIP6</i>   | F | TGGCTACATGATCTGAGAATGAC     |
|                 | R | GATGGTTAATTTCAATGCGGTGT     |
| <i>ZMZIP8</i>   | F | GTGTCGTCATTTGCCAGTAATTC     |
|                 | R | TTCAGCTCGTAGATTCATTAGGG     |
| <i>ZMIRT1</i>   | F | CTCGTCGTCGTGGTCACCATAGA     |
|                 | R | GCAGGAGGACTCAAAGTGCCCA      |

---
